# Supplementary material for: Automatic Identification of Patients With Unexplained Left Ventricular Hypertrophy in Electronic Health Record Data to Improve Targeted Treatment and Family Screening
Source: PubMed Central journal article supplement (PMC9051030; doi:10.3389/fcvm.2022.768847), 2022-04-15
Supplement: Data_Sheet_1.pdf [file Data_Sheet_1.pdf]

**Automatic identification of patients with unexplained left ventricular hypertrophy in  
electronic health record data to improve targeted treatment and family screening**

Sammani, Jansen et al. (2021)

**Supplements**

## Supplemental Methods

### Text-mining

For the text mining method, an algorithm was created using the software program: CTCue population finder version 2.0.12 (CTCue, Amsterdam, The Netherlands). This tool uses Boolean retrieval method to search through unstructured EHR data such as clinical discharge letters and in-hospital consultations. The output of the tool is a list of flagged patients that meet the inclusion criteria or the query using a proprietary (black box) algorithm. The query was designed to identify patients with unexplained LVH, defined as LVH excluding hypertension and aortic stenosis and can be summarised as: ([Age > 17] AND [LVH-synonyms OR ULVH-synonyms] AND [patient at cardiology]) NOT ([hypertension-synonyms] OR [aortic stenosis-synonym]). Synonyms included suggestions by the built-in synonym expander supplemented with commonly used synonyms and abbreviations.

### Machine learning algorithm

Within subjects with LVH on echocardiography, an XGBoost algorithm was trained. The model was trained on a random selection of 80% of data (train set, stratified on outcome). Echocardiographic LVH was defined as a maximum wall thickness of >12 mm or a left ventricular mass indexed to body surface area >115 in males and >95 in females, in line with current guidelines.[3,21,31] An additional model was built using identification by CTCue as a dichotomous variable (yes/no) to address added value of CTCue in identifying ULVH within this subset dataset with LVH. XGBoost is an ensemble ML algorithm that uses extreme gradient boosting framework to convert a set of weak tree classifiers into a single strong classifier. It iterates through a process of re-weighting, adding terminal node penalisation (gamma) to allow variability in the numbers of terminal nodes per tree, additional regularisation of terminal node weights, Newton boosting to fit subsequent trees and column subsampling as an additional randomisation parameter.[1,2] Hyperparameters were tuned using consecutive 5-fold cross-validated grid-searches (provided in the Supplemental Methods) with the *caret* package.[3] The model was tested in 20% of the data. To provide a readily interpretable model, logistic regression was fitted on the train set using the top 50 best performing variables. Missing data were imputed using iterative Random forest imputations consisting of 100 trees per forest and a maximum of 10 iterations, using the *missForest* package.[4] Logistic regression was performed using 5-fold cross-validated Lasso regression to attenuate multicollinearity effects, using the *caret* and *glmnet* packages.[5]

1. Friedman JH. Greedy function approximation: A gradient boosting machine. *Ann Stat* [Internet]. 2001;29:1189–232. Available from: <http://projecteuclid.org/euclid.aos/1013203451>
2. Chen T, Guestrin C. XGBoost: A scalable tree boosting system. *Proc ACM SIGKDD Int Conf Knowl Discov Data Min* [Internet]. New York, NY, USA: ACM; 2016. p. 785–94. Available from: <https://dl.acm.org/doi/10.1145/2939672.2939785>
3. Kuhn M. Building predictive models in R using the caret package. *J Stat Softw* [Internet]. 2008;28:1–26. Available from: <http://www.jstatsoft.org/v28/i05/>
4. Stekhoven DJ, Buhlmann P. MissForest--non-parametric missing value imputation for mixed-type data. *Bioinformatics* [Internet]. 2012;28:112–8. Available from: <https://academic.oup.com/bioinformatics/article-lookup/doi/10.1093/bioinformatics/btr597>
5. Friedman J, Hastie T, Tibshirani R. Regularization paths for generalized linear models via coordinate descent. *J Stat Softw* [Internet]. 2010;33:1–22. Available from: <http://www.ncbi.nlm.nih.gov/pubmed/20808728>

## XGBoost hyperparameter tuning

Hyperparameter tuning was performed using grid searches in five steps, as detailed on Pelkoja (2018). "Visual XGBoost Tuning with caret." (Retrieved 19-10-2020, from <https://www.kaggle.com/pelkoja/visual-xgboost-tuning-with-caret>).

### Step 1. Temporarily fixing learning rate

|                                                    |                       |
|----------------------------------------------------|-----------------------|
| Number of iterations                               | 200 to 1000, per 50   |
| Learning rate                                      | 0.025, 0.05, 0.1, 0.3 |
| Maximum tree depth                                 | 2, 3, 4, 5, 6         |
| Gamma                                              | 0                     |
| Subsample ratio of columns                         | 1                     |
| Subsample ratio of rows                            | 1                     |
| Minimum sum of instance weight required in a child | 1                     |

### Step 2. Maximum tree depth & minimum sum of instance weights required in a child

|                                                    |                                                                      |
|----------------------------------------------------|----------------------------------------------------------------------|
| Number of iterations                               | 50 to 1000, per 50                                                   |
| Learning rate                                      | Step 1 best                                                          |
| Maximum tree depth                                 | 2-4 step 1 best was 2,<br>otherwise step 1 best -1 to step 1 best +1 |
| Gamma                                              | 0                                                                    |
| Subsample ratio of columns                         | 1                                                                    |
| Subsample ratio of rows                            | 1                                                                    |
| Minimum sum of instance weight required in a child | 1, 2, 3                                                              |

### Step 3. Subsample ratios

|                                                    |                    |
|----------------------------------------------------|--------------------|
| Number of iterations                               | 50 to 1000, per 50 |
| Learning rate                                      | Step 1 best        |
| Maximum tree depth                                 | Step 2 best        |
| Gamma                                              | 0                  |
| Subsample ratio of columns                         | 0.4, 0.6, 0.8, 1.0 |
| Subsample ratio of rows                            | 0.5, 0.75, 1.0     |
| Minimum sum of instance weight required in a child | Step 2 best        |

### Step 4. Gamma

|                                                    |                                  |
|----------------------------------------------------|----------------------------------|
| Number of iterations                               | 50 to 1000, per 50               |
| Learning rate                                      | Step 1 best                      |
| Maximum tree depth                                 | Step 2 best                      |
| Gamma                                              | 0, 0.05, 0.1, 0.5, 0.7, 0.9, 1.0 |
| Subsample ratio of columns                         | Step 3 best                      |
| Subsample ratio of rows                            | Step 3 best                      |
| Minimum sum of instance weight required in a child | Step 2 best                      |

Step 5. Reducing the learning rate eta & determining number of iterations

|                                                    |                               |
|----------------------------------------------------|-------------------------------|
| Number of iterations                               | 100 to 10,000, per 100        |
| Learning rate                                      | 0.01, 0.015, 0.025, 0.05, 0.1 |
| Maximum tree depth                                 | Step 2 best                   |
| Gamma                                              | Step 4 best                   |
| Subsample ratio of columns                         | Step 3 best                   |
| Subsample ratio of rows                            | Step 3 best                   |
| Minimum sum of instance weight required in a child | Step 2 best                   |

Final model

|                                                    |             |
|----------------------------------------------------|-------------|
| Number of iterations                               | Step 5 best |
| Learning rate                                      | Step 5 best |
| Maximum tree depth                                 | Step 2 best |
| Gamma                                              | Step 4 best |
| Subsample ratio of columns                         | Step 3 best |
| Subsample ratio of rows                            | Step 3 best |
| Minimum sum of instance weight required in a child | Step 2 best |

## Supplemental Tables

Supplemental Table 1. Parameters & outlier handling

| Variable                               | Outlier handling                | Values                        | Missingness |
|----------------------------------------|---------------------------------|-------------------------------|-------------|
| <b>Demographics</b>                    |                                 |                               |             |
| Sex                                    | -                               | -                             | 0.000       |
| Age (years)                            | Values < 18 excluded            | At last echo                  | 0.000       |
| Mean systolic blood pressure (mmHg)    | Values < 1 & > 300 excluded     | Min, mean, max                | 0.255       |
| Mean diastolic blood pressure (mmHg)   | Values < 1 excluded             | Min, mean, max                | 0.255       |
| Body surface area (m <sup>2</sup> )    | Values > 5 & < 0.5 excluded     | First, last, min, median, max | 0.102       |
| <b>Electrocardiography</b>             |                                 |                               |             |
| Atrial rate (bpm)                      | -                               | First, last, min, median, max | 0.013       |
| Ventricular rate (bpm)                 | -                               | First, last, min, median, max | 0.013       |
| P axis (°)                             | -                               | First, last, min, median, max | 0.037       |
| R axis (°)                             | -                               | First, last, min, median, max | 0.014       |
| T axis (°)                             | -                               | First, last, min, median, max | 0.014       |
| PQ interval (ms)                       | -                               | First, last, min, median, max | 0.037       |
| QRS duration (ms)                      | -                               | First, last, min, median, max | 0.013       |
| QT interval (ms)                       | -                               | First, last, min, median, max | 0.013       |
| QTc (Bazett) (ms)                      | -                               | First, last, min, median, max | 0.013       |
| QTc (Fredericia) (ms)                  | -                               | First, last, min, median, max | 0.047       |
| P peak amplitude (II)                  | -                               | first, last, min, median, max | 0.013       |
| PP peak amplitude (V1)                 | -                               | first, last, min, median, max | 0.013       |
| Q peak amplitude (aVL, V5, V6)         | -                               | First, last, min, median, max | 0.013       |
| Q peak area (I-III, aVF/-L, V5, V6)    | -                               | First, last, min, median, max | 0.013       |
| R max. amplitude (I, aVL, V5, V6)      | -                               | First, last, min, median, max | 0.013       |
| S max. amplitude (III, aVR, V1-3)      | -                               | First, last, min, median, max | 0.013       |
| ST minimum (I, aVL, V5, V6)            | -                               | First, last, min, median, max | 0.013       |
| T peak amplitude (I, aVL, V5, V6)      | -                               | First, last, min, median, max | 0.013       |
| <b>Echocardiography</b>                |                                 |                               |             |
| IVS thickness (cm)                     | Values < 0.2 & > 4.0 excluded   | First, last, min, median, max | 0.010       |
| IVS/LV posterior wall ratio            | Values < 0.2 & > 4.0 excluded   | First, last, min, median, max | 0.031       |
| LV posterior wall thickness (cm)       | Values < 0.1 & > 5.0 excluded   | First, last, min, median, max | 0.016       |
| LV mass (g)                            | Values < 20 & > 400 excluded    | First, last, min, median, max | 0.023       |
| Indexed LV mass (g/m <sup>2</sup> )    | Values < 10 & > 300 excluded    | First, last, min, median, max | 0.132       |
| LV end-diastolic diameter (cm)         | Values < 0 & > 15 excluded      | First, last, min, median, max | 0.012       |
| LV end-diastolic volume (mL) *         | Values < 30 & > 1000 excluded   | First, last, min, median, max | 0.012       |
| LV end-systolic diameter (cm)          | Values < 0 & > 10 excluded      | First, last, min, median, max | 0.200       |
| LV end-systolic volume (mL) *          | Values < 5 & > 500 excluded     | First, last, min, median, max | 0.151       |
| LV ejection fraction (%) *             | Values < 10 & > 80 excluded     | First, last, min, median, max | 0.193       |
| LV fractional shortening (%)           | Values < 5 & > 80 excluded      | First, last, min, median, max | 0.206       |
| LV outflow tract gradient (mmHg)       | Values < 0 & > 200 excluded     | First, last, min, median, max | 0.100       |
| Aortic valve gradient (mmHg)           | Values < 0 & > 200 excluded     | First, last, min, median, max | 0.073       |
| LA dimension (cm)                      | Values < 1 & > 9.9 excluded     | First, last, min, median, max | 0.409       |
| LA volume (mL)                         | Excluded (missingness)          |                               | 0.617       |
| Indexed LA volume (mL/m <sup>2</sup> ) | Excluded (missingness)          |                               | 0.629       |
| E/A                                    | Values < 0 & > 5 excluded       | First, last, min, median, max | 0.143       |
| Average E/e'                           | Values < 0 & > 40 excluded      | First, last, min, median, max | 0.260       |
| Lateral E/e'                           | Values < 0 & > 40 excluded      | First, last, min, median, max | 0.252       |
| Septal E/e'                            | Values < 0 & > 40 excluded      | First, last, min, median, max | 0.253       |
| MV deceleration time (s)               | Values < 0.030 & 0.600 excluded | First, last, min, median, max | 0.257       |
| TAPSE (cm)                             | Values < 1 & > 40 excluded      | First, last, min, median, max | 0.232       |

List of the variables (a priori) intended for modelling, showing outlier handling strategies, values taken from longitudinal measurements and missingness. Missingness >0.50 is indicated in red.

\* Taken from available methods, in the following order: (i) Modified Simpson, (ii) 3D-methods, (iii) other biplane methods, (iv) Teichholz's/cubed formula.

IVS, interventricular septum; LV, left ventricular; LA, left atrial; MV, mitral valve; TAPSE, tricuspid annular plane systolic excursion.

**Supplemental Table 2. Genotypes**

|                            | All G+ HCM<br>(n = 41) |           | G+ Echocardiographic LVH<br>(n = 38) |           | G+ Text mining<br>(n = 35) |           |
|----------------------------|------------------------|-----------|--------------------------------------|-----------|----------------------------|-----------|
|                            | P                      | LP        | P                                    | LP        | P                          | LP        |
| <b>Definitive</b>          |                        |           |                                      |           |                            |           |
| <i>MYBPC3</i>              | 22 (56.4) *†           |           | 21 (56.8) *†                         |           | 19 (57.6) *†               |           |
| <i>MYH7</i>                | 4 (11.1)               | 3 (8.6)   | 3 (9.1)                              | 3 (9.1)   | 4 (13.3)                   | 3 (10.3)  |
| <i>TNNT2</i>               |                        | 1 (2.8)   |                                      | 1 (2.9)   |                            | 0 (0.0)   |
| <i>TNNI3</i>               | 1 (2.8)                |           | 1 (2.9)                              |           | 0 (0.0)                    |           |
| <i>MYL3</i>                | 1 (2.9)                | 1 (2.9)   | 1 (3.0)                              | 1 (3.0)   | 1 (3.4)                    | 1 (3.4)   |
| <i>MYL2</i>                | 1 (2.8)                |           | 0 (0.0)                              |           | 1 (3.3)                    |           |
| <i>GLA</i> (Fabry disease) | 2 (5.6)                |           | 2 (5.9)                              |           | 2 (6.7)                    |           |
| <i>TTR</i> (amyloidosis)   | 1 (2.7)                |           | 1 (2.9)                              |           | 1 (3.2)                    |           |
| <b>Moderate</b>            |                        |           |                                      |           |                            |           |
| <i>CSRP3</i>               | 4 (11.1) *             |           | 4 (11.8) *                           |           | 4 (13.3) *                 |           |
| <i>ACTN2</i>               |                        | 2 (5.6) † |                                      | 2 (5.9) † |                            | 1 (3.3) † |

Number of patients with pathogenic or likely pathogenic variants (per gene), showing variants identified in the overall study population and in the subpopulations identified by selecting patients with echocardiographic left ventricular hypertrophy or using text mining.

\* including one patient with a pathogenic variant in *MYBPC3* and a pathogenic variant in *CSRP3*; † including one patient with a pathogenic variant in *MYBPC3* and a likely pathogenic variant in *ACTN2*.

G+, genetically-confirmed; HCM, hypertrophic cardiomyopathy; P, pathogenic; LP, likely pathogenic; LVH, left ventricular hypertrophy

**Supplemental Table 3. Baseline characteristics stratified by CTCue**

|                                                        | Identified by CTCue<br>(n = 8,123) | Not identified by CTCue<br>(n = 18,583) | p-value          |
|--------------------------------------------------------|------------------------------------|-----------------------------------------|------------------|
| <b>Demographics</b>                                    |                                    |                                         |                  |
| Sex (male)                                             | 4744 (58.4)                        | 10027 (54.0)                            | <b>&lt;0.001</b> |
| Age (years)                                            | 63.43 [50.81, 73.01]               | 59.86 [45.20, 71.52]                    | <b>&lt;0.001</b> |
| Body surface area (m <sup>2</sup> )                    | 1.93 [1.78, 2.09]                  | 1.91 [1.75, 2.06]                       | <b>&lt;0.001</b> |
| Systolic blood pressure (mmHg)                         | 132.15 (17.83)                     | 127.42 (17.70)                          | <b>&lt;0.001</b> |
| Diastolic blood pressure (mmHg)                        | 75.71 (10.77)                      | 73.74 (10.40)                           | <b>&lt;0.001</b> |
| <b>Electrocardiography</b>                             |                                    |                                         |                  |
| Atrial rate (bpm)                                      | 70.00 [62.00, 81.00]               | 72.00 [63.00, 85.00]                    | <b>&lt;0.001</b> |
| Ventricular rate (bpm)                                 | 70.00 [62.00, 80.00]               | 72.00 [63.00, 84.00]                    | <b>&lt;0.001</b> |
| P axis (°)                                             | 54.00 [36.00, 67.00]               | 54.00 [38.00, 68.00]                    | <b>0.01</b>      |
| R axis (°)                                             | 24.00 [-13.00, 58.00]              | 34.00 [-6.00, 65.00]                    | <b>&lt;0.001</b> |
| T axis (°)                                             | 53.00 [31.00, 75.00]               | 50.00 [29.00, 71.00]                    | <b>&lt;0.001</b> |
| PQ interval (ms)                                       | 164.00 [146.00, 186.00]            | 158.00 [140.00, 180.00]                 | <b>&lt;0.001</b> |
| QRS duration (ms)                                      | 98.00 [88.00, 110.00]              | 96.00 [86.00, 110.00]                   | <b>&lt;0.001</b> |
| QT interval (ms)                                       | 398.00 [376.00, 424.00]            | 394.00 [368.00, 422.00]                 | <b>&lt;0.001</b> |
| QTc (Fredericia) (ms)                                  | 417.00 [401.75, 439.00]            | 416.00 [399.00, 440.00]                 | <b>0.034</b>     |
| <b>Echocardiography</b>                                |                                    |                                         |                  |
| IVS thickness (cm)                                     | 1.14 [0.98, 1.32]                  | 1.00 [0.86, 1.14]                       | <b>&lt;0.001</b> |
| IVS/LV posterior wall ratio                            | 1.14 [1.02, 1.31]                  | 1.07 [0.97, 1.21]                       | <b>&lt;0.001</b> |
| LV posterior wall thickness (cm)                       | 1.06 [0.92, 1.20]                  | 0.96 [0.84, 1.08]                       | <b>&lt;0.001</b> |
| LV mass (g)                                            | 195.66 [154.39, 246.17]            | 171.43 [135.78, 218.29]                 | <b>&lt;0.001</b> |
| Indexed LV mass (g/m <sup>2</sup> )                    | 99.82 [81.06, 123.98]              | 88.10 [72.33, 109.34]                   | <b>&lt;0.001</b> |
| LV end-diastolic diameter (cm)                         | 4.83 (0.76)                        | 4.97 (0.83)                             | <b>&lt;0.001</b> |
| LV end-diastolic volume (mL)                           | 106.69 [84.82, 133.81]             | 111.27 [88.53, 138.11]                  | <b>&lt;0.001</b> |
| LV end-systolic diameter (cm)                          | 3.12 [2.68, 3.65]                  | 3.17 [2.74, 3.74]                       | <b>&lt;0.001</b> |
| LV end-systolic volume (mL)                            | 42.49 [29.67, 60.52]               | 42.39 [30.16, 62.04]                    | <b>0.006</b>     |
| LV ejection fraction (%)                               | 58.81 [50.17, 68.37]               | 59.86 [49.36, 69.62]                    | 0.137            |
| LV fractional shortening (%)                           | 34.90 [27.25, 41.92]               | 34.81 [26.67, 41.58]                    | <b>0.029</b>     |
| LV outflow tract gradient (mmHg)                       | 3.60 [2.64, 4.89]                  | 3.55 [2.59, 4.68]                       | <b>&lt;0.001</b> |
| Aortic valve gradient (mmHg)                           | 6.97 [5.05, 10.90]                 | 6.37 [4.78, 9.03]                       | <b>&lt;0.001</b> |
| LA dimension (cm)                                      | 4.00 [3.56, 4.54]                  | 3.90 [3.45, 4.45]                       | <b>&lt;0.001</b> |
| E/A                                                    | 0.95 [0.73, 1.32]                  | 1.07 [0.79, 1.46]                       | <b>&lt;0.001</b> |
| Average E/e'                                           | 8.45 [6.75, 11.21]                 | 7.89 [6.28, 10.51]                      | <b>&lt;0.001</b> |
| Lateral E/e'                                           | 7.22 [5.58, 9.74]                  | 6.72 [5.23, 9.17]                       | <b>&lt;0.001</b> |
| Septal E/e'                                            | 9.62 [7.57, 12.80]                 | 8.96 [7.04, 11.91]                      | <b>&lt;0.001</b> |
| MV deceleration time (s)                               | 0.19 [0.16, 0.23]                  | 0.18 [0.15, 0.21]                       | <b>&lt;0.001</b> |
| TAPSE (cm)                                             | 2.21 (0.53)                        | 2.19 (0.54)                             | <b>0.022</b>     |
| <b>Outcome criteria</b>                                |                                    |                                         |                  |
| Left ventricular hypertrophy                           | 4767 (58.7)                        | 7090 (38.2)                             | <b>&lt;0.001</b> |
| Maximum wall thickness ≥13 mm                          | 2491 (30.7)                        | 2483 (13.4)                             | <b>&lt;0.001</b> |
| LV mass/BSA >115 (male), >95 (female) g/m <sup>2</sup> | 4241 (57.0)                        | 6336 (40.2)                             | <b>&lt;0.001</b> |
| ULVH diagnosis                                         | 159 (2.0)                          | 45 (0.2)                                | <b>&lt;0.001</b> |
| Amyloidosis                                            | 37                                 | 19                                      |                  |
| G+ HCM                                                 | 35                                 | 6                                       |                  |
| ICD10                                                  | 100                                | 26                                      |                  |

Subject characteristics, shown as means (standard deviation), medians [interquartile range] or counts (%), stratified by identification by text mining. P-values <0.05 are shown in bold. IVS, interventricular septum; LV, left ventricular;



LA, left atrial; MV; TAPSE, tricuspid annular plane systolic excursion; ICD10, World Health Organization International Statistical Classification of Diseases and Related Health Problems, tenth revision; ULVH:Unexplained Left Ventricular Hypertrophy.

Supplemental Table 4. Qualitative assessment of under classification by CTCue

| LVH not mentioned | Ambiguous writing | Hypertension | Aortic stenosis | LVH clearly mentioned | Notes                                                               | Missed, and can be explained logically | Missed, without apparent explanation | HCM diagnosed by cardiologists? |
|-------------------|-------------------|--------------|-----------------|-----------------------|---------------------------------------------------------------------|----------------------------------------|--------------------------------------|---------------------------------|
| yes               |                   |              |                 |                       | "duidelijke hypertrofie", but left ventricle not mentioned          | yes                                    | no                                   | yes                             |
|                   |                   |              |                 | yes                   | hypertrofie linkerventrikel, should not have been missed            | no                                     | yes                                  | yes                             |
|                   |                   |              |                 | yes                   | "linkerventrikelhypertrofie" should not have been missed            | no                                     | yes                                  | yes                             |
| yes               |                   |              |                 |                       | Restrictive CMP with amyloid and LVH, also essentiële hypertensie   | yes                                    | no                                   | no                              |
|                   |                   |              |                 | yes                   | hypertensie: nee                                                    | no                                     | yes                                  | yes                             |
|                   |                   |              |                 |                       | Cardio file without cardio consultation, no mention of LVH          | yes                                    | no                                   | no                              |
|                   |                   |              |                 | yes                   | First controls: geen HOCM, but developed it later on                | yes                                    | no                                   | yes                             |
|                   |                   |              | yes             | yes                   | No HCM but explained LVH                                            | yes                                    | no                                   | no                              |
|                   |                   |              |                 | yes                   | geringe LVH, hypertensie: nee                                       | no                                     | yes                                  | yes                             |
|                   |                   |              |                 | yes                   | linker ventrikelhypertrofie                                         | no                                     | yes                                  | yes                             |
|                   |                   |              |                 | yes                   | belangrijke hypertrofie                                             | yes                                    | no                                   | no                              |
| yes               |                   |              |                 |                       | concentrische hypertrofie van de linkerventrikelwand                | no                                     | yes                                  | yes                             |
|                   |                   |              |                 | yes                   | HCM                                                                 | yes                                    | no                                   | no                              |
|                   |                   |              |                 | yes                   | HOCM                                                                | no                                     | yes                                  | yes                             |
|                   |                   |              |                 | yes                   | HCM                                                                 | no                                     | yes                                  | yes                             |
|                   |                   |              |                 | yes                   | hypertrophische cardiomyopathiemutatie and LVH mentioned in letters | no                                     | yes                                  | yes                             |
|                   |                   |              |                 | yes                   | HCM                                                                 | no                                     | yes                                  | yes                             |
|                   |                   |              |                 | yes                   | hypertrofische cardiomyopathie                                      | no                                     | yes                                  | yes                             |
|                   |                   |              |                 | yes                   | hypertrofische cardiomyopathie                                      | no                                     | yes                                  | yes                             |
|                   |                   |              |                 | yes                   | Al amyloidose met RCM "en wanden vrij fors zijn"                    | yes                                    | no                                   | no                              |
|                   |                   |              |                 | yes                   | hypertrofische cardiomyopathie                                      | no                                     | yes                                  | yes                             |
|                   |                   |              |                 | yes                   | HCM                                                                 | no                                     | yes                                  | yes                             |
|                   |                   |              |                 | yes                   | "lichte hypertrofie"                                                | yes                                    | no                                   | no                              |
|                   |                   |              |                 | yes                   | LVH                                                                 | yes                                    | no                                   | yes                             |
|                   |                   |              |                 | yes                   | hypertrofe cardiomyopathie; pulmonale hypertensie                   | yes                                    | yes                                  | yes                             |
|                   |                   |              |                 | yes                   | hypertrofische obstructieve cardiomyopathie                         | no                                     | yes                                  | yes                             |
|                   |                   |              |                 | yes                   | biventriculaire hypertrofie                                         | yes                                    | no                                   | yes                             |
| yes               |                   |              |                 | yes                   | linker ventrikel hypertrofie                                        | yes                                    | no                                   | yes                             |
|                   |                   |              |                 | yes                   | HCM and hypertension                                                | yes                                    | no                                   | yes                             |
| no                |                   |              |                 |                       | restrictieve omp met geringe deel hypertrofie                       | yes                                    | no                                   | no                              |
|                   |                   |              |                 | yes                   | beginnende LVH                                                      | no                                     | yes                                  | yes                             |
|                   |                   |              |                 | yes                   | hypertensie not negated in text                                     | yes                                    | no                                   | yes                             |
|                   |                   |              |                 | yes                   | hypertrofie obstructieve cardiomyopathie                            | no                                     | yes                                  | yes                             |
|                   |                   |              |                 | yes                   | hypertrofische cardiomyopathie                                      | no                                     | yes                                  | yes                             |
|                   |                   |              |                 | yes                   | hcm                                                                 | no                                     | yes                                  | yes                             |
|                   |                   |              |                 | yes                   | hypertrofische biventriculaire cardiomyopathie                      | yes                                    | no                                   | yes                             |
|                   |                   |              |                 | yes                   | pulmonale hypertensie; toont duidelijke LVH                         | yes                                    | no                                   | yes                             |
|                   |                   |              |                 | yes                   | pulmonale hypertensie                                               | yes                                    | no                                   | yes                             |
|                   |                   |              |                 | yes                   | hypertensieve CMP                                                   | yes                                    | no                                   | no                              |
|                   |                   |              |                 | yes                   | hypertrofische cardiomyopathie                                      | yes                                    | no                                   | no                              |
|                   |                   |              |                 | yes                   | hypertrofische cardiomyopathie                                      | yes                                    | no                                   | yes                             |

**Supplemental Table 5. Baseline characteristics stratified by left ventricular hypertrophy**

|                                       | Left ventricular hypertrophy<br>(n = 11857) | No left ventricular hypertrophy<br>(n = 14849) | p-value          |
|---------------------------------------|---------------------------------------------|------------------------------------------------|------------------|
| <b>Demographics</b>                   |                                             |                                                |                  |
| Sex (male)                            | 7841 (66.1)                                 | 6930 (46.7)                                    | <b>&lt;0.001</b> |
| Age (years)                           | 66.30 [54.35, 75.35]                        | 56.29 [41.03, 68.34]                           | <b>&lt;0.001</b> |
| Body surface area (m <sup>2</sup> )   | 1.94 [1.79, 2.09]                           | 1.88 [1.74, 2.04]                              | <b>&lt;0.001</b> |
| Systolic blood pressure (mmHg)        | 129.72 (18.46)                              | 128.42 (17.32)                                 | <b>&lt;0.001</b> |
| Diastolic blood pressure (mmHg)       | 74.18 (10.79)                               | 74.63 (10.36)                                  | <b>0.003</b>     |
| <b>Electrocardiography</b>            |                                             |                                                |                  |
| Atrial rate (bpm)                     | 72.00 [62.00, 85.00]                        | 72.00 [63.00, 84.00]                           | 0.134            |
| Ventricular rate (bpm)                | 71.00 [62.00, 83.00]                        | 71.00 [63.00, 83.00]                           | 0.633            |
| P axis (°)                            | 54.00 [35.00, 68.00]                        | 55.00 [38.00, 67.00]                           | 0.098            |
| R axis (°)                            | 17.00 [-22.00, 57.00]                       | 40.00 [4.00, 66.00]                            | <b>&lt;0.001</b> |
| T axis (°)                            | 56.00 [29.00, 89.00]                        | 48.00 [30.00, 65.00]                           | <b>&lt;0.001</b> |
| PQ interval (ms)                      | 166.00 [146.00, 190.00]                     | 154.00 [138.00, 174.00]                        | <b>&lt;0.001</b> |
| QRS duration (ms)                     | 102.00 [92.00, 128.00]                      | 92.00 [84.00, 102.00]                          | <b>&lt;0.001</b> |
| QT interval (ms)                      | 404.00 [378.00, 436.00]                     | 390.00 [366.00, 414.00]                        | <b>&lt;0.001</b> |
| QTc (Fredericia) (ms)                 | 425.00 [406.00, 454.00]                     | 411.00 [396.00, 429.00]                        | <b>&lt;0.001</b> |
| <b>Echocardiography</b>               |                                             |                                                |                  |
| IVS thickness (cm)                    | 1.20 [1.05, 1.38]                           | 0.93 [0.82, 1.04]                              | <b>&lt;0.001</b> |
| IVS/LV posterior wall ratio           | 1.15 [1.02, 1.32]                           | 1.05 [0.96, 1.18]                              | <b>&lt;0.001</b> |
| LV posterior wall thickness (cm)      | 1.11 [0.99, 1.25]                           | 0.90 [0.80, 1.00]                              | <b>&lt;0.001</b> |
| LV mass (g)                           | 229.74 [198.44, 274.01]                     | 145.78 [121.43, 171.08]                        | <b>&lt;0.001</b> |
| Indexed LV mass (g/m <sup>2</sup> )   | 115.55 [102.54, 136.77]                     | 75.63 [65.10, 84.90]                           | <b>&lt;0.001</b> |
| LV end-diastolic diameter (cm)        | 5.18 (0.94)                                 | 4.72 (0.63)                                    | <b>&lt;0.001</b> |
| LV end-diastolic volume (mL)          | 123.63 [95.20, 156.26]                      | 102.16 [83.59, 123.08]                         | <b>&lt;0.001</b> |
| LV end-systolic diameter (cm)         | 3.43 [2.89, 4.18]                           | 3.00 [2.62, 3.40]                              | <b>&lt;0.001</b> |
| LV end-systolic volume (mL)           | 51.17 [34.76, 79.80]                        | 37.47 [27.34, 50.23]                           | <b>&lt;0.001</b> |
| LV ejection fraction (%)              | 55.78 [42.91, 66.99]                        | 62.02 [54.12, 70.62]                           | <b>&lt;0.001</b> |
| LV fractional shortening (%)          | 32.54 [22.62, 40.76]                        | 36.17 [29.91, 42.32]                           | <b>&lt;0.001</b> |
| LV outflow tract gradient (mmHg)      | 4.09 [2.98, 5.65]                           | 3.97 [3.02, 5.16]                              | <b>&lt;0.001</b> |
| Aortic valve gradient (mmHg)          | 8.06 [5.68, 14.27]                          | 6.55 [5.02, 8.85]                              | <b>&lt;0.001</b> |
| LA dimension (cm)                     | 4.23 [3.78, 4.82]                           | 3.69 [3.30, 4.11]                              | <b>&lt;0.001</b> |
| E/A                                   | 0.96 [0.71, 1.37]                           | 1.08 [0.81, 1.44]                              | <b>&lt;0.001</b> |
| Average E/e'                          | 9.23 [7.09, 12.69]                          | 7.44 [6.03, 9.32]                              | <b>&lt;0.001</b> |
| Lateral E/e'                          | 7.79 [5.85, 10.92]                          | 6.35 [5.05, 8.20]                              | <b>&lt;0.001</b> |
| Septal E/e'                           | 10.44 [7.97, 14.57]                         | 8.39 [6.76, 10.63]                             | <b>&lt;0.001</b> |
| MV deceleration time (s)              | 0.19 [0.15, 0.23]                           | 0.18 [0.15, 0.21]                              | <b>&lt;0.001</b> |
| TAPSE (cm)                            | 2.12 (0.57)                                 | 2.27 (0.51)                                    | <b>&lt;0.001</b> |
| <b>Outcome criteria</b>               |                                             |                                                |                  |
| Identified by CTCue population finder | 4767 (40.2)                                 | 3356 (22.6)                                    | <b>&lt;0.001</b> |
| ULVH diagnosis                        | 193 (1.6)                                   | 11 (0.1)                                       | <b>&lt;0.001</b> |
| Amyloidosis                           | 53                                          | 3                                              |                  |
| G+ HCM                                | 38                                          | 3                                              |                  |
| ICD10                                 | 121                                         | 5                                              |                  |

Subject characteristics, shown as means (standard deviation), medians [interquartile range] or counts (%), stratified by presence of echocardiographic left ventricular hypertrophy (maximum wall thickness of >12 mm or a left ventricular mass indexed to body surface area >115 in males and >95 in females). P-values <0.05 are shown in bold.

IVS, interventricular septum; LV, left ventricular; LA, left atrial; MV; TAPSE, tricuspid annular plane systolic excursion; ICD10, World Health Organization International Statistical Classification of Diseases and Related Health Problems, tenth revision.

**Supplemental Table 6. Performance measures XGBoost**

|                             | <b>Echocardiographic<br/>LVH<br/>(n = 2,456)</b> | <b>Echocardiographic<br/>LVH<br/>(text mining as<br/>variable)<br/>(n = 2,456)</b> | <b>Text mining<br/>(n = 1,637)</b> |
|-----------------------------|--------------------------------------------------|------------------------------------------------------------------------------------|------------------------------------|
| <b>Before manual review</b> |                                                  |                                                                                    |                                    |
| Sensitivity                 | 0.2564                                           | 0.1795                                                                             | 0.1290                             |
| Specificity                 | 0.9979                                           | 0.9979                                                                             | 0.9988                             |
| Positive predictive value   | 0.6667                                           | 0.5833                                                                             | 0.6667                             |
| Negative predictive value   | 0.9881                                           | 0.9869                                                                             | 0.9834                             |
| Likelihood ratio +          | 26                                               | 18                                                                                 | 13                                 |
| Likelihood ratio -          | 0.75                                             | 0.83                                                                               | 0.88                               |
| <b>After manual review</b>  |                                                  |                                                                                    |                                    |
| Sensitivity                 | 0.32                                             |                                                                                    |                                    |
| Specificity                 | 0.99                                             |                                                                                    |                                    |
| Positive predictive value   | 0.72                                             |                                                                                    |                                    |
| Negative predictive value   | 0.99                                             |                                                                                    |                                    |
| Likelihood ratio +          | 32                                               |                                                                                    |                                    |
| Likelihood ratio -          | 0.69                                             |                                                                                    |                                    |

Performance of the three hypertuned XGBoost models on the holdout set (20% of total subjects identified through each method), before and after reclassification by manual review. LVH, left ventricular hypertrophy.

**Supplemental Table 7. Performance measures Lasso regression**

|                                          | <b>Coefficients without text mining variable</b> | <b>Coefficients with text mining variable</b> |
|------------------------------------------|--------------------------------------------------|-----------------------------------------------|
| Intercept                                | -10.2                                            | -12.5                                         |
| Age (years)                              | -0.0212                                          | -0.0186                                       |
| Systolic blood pressure (mmHg), max      | -0.0157                                          | -0.0165                                       |
| Systolic blood pressure (mmHg), mean     | -0.0117                                          | -0.0151                                       |
| P axis (°), last                         | -1.64E-04                                        | -                                             |
| T axis (°), first                        | 2.17E-03                                         | 2.30E-03                                      |
| T axis (°), last                         | 3.03E-03                                         | 3.67E-03                                      |
| PQ interval (ms), median                 | 2.76E-03                                         | 2.24E-03                                      |
| QT interval (ms), median                 | 0.0118                                           | 0.0103                                        |
| QTC Fredericia (ms), last                | 1.50E-03                                         | 3.17E-03                                      |
| P area II, max                           | -                                                | 2.54E-06                                      |
| P area II, median                        | 4.04E-04                                         | 4.24E-04                                      |
| Q amplitude aVL, max                     | 5.73E-05                                         | 1.02E-04                                      |
| R amplitude aVL, median                  | -2.25E-04                                        | -3.11E-04                                     |
| R amplitude I, first                     | 2.07E-04                                         | 2.02E-04                                      |
| R amplitude V6, first                    | -4.10E-04                                        | -4.18E-04                                     |
| S amplitude V3, first                    | -5.76E-05                                        | -9.40E-05                                     |
| T amplitude aVL, last                    | -2.35E-04                                        | -2.30E-04                                     |
| T amplitude aVL, median                  | -4.89E-04                                        | -3.03E-04                                     |
| T amplitude V5, first                    | -5.05E-04                                        | -5.29E-04                                     |
| T amplitude V5, median                   | -6.49E-04                                        | -4.54E-04                                     |
| IVS thickness (cm), first                | 0.274                                            | 0.472                                         |
| IVS thickness (cm), max                  | 1.02                                             | 0.768                                         |
| IVS thickness (cm), median               | 0.816                                            | 0.699                                         |
| LV posterior wall thickness (cm), first  | 0.556                                            | 0.259                                         |
| LV posterior wall thickness (cm), max    | 1.04                                             | 0.705                                         |
| LV posterior wall thickness (cm), median | 0.152                                            | 0.903                                         |
| LV end-diastolic diameter, median        | -8.05E-03                                        | -                                             |
| LV end-diastolic volume (mL), max        | -                                                | -2.51E-03                                     |
| LV end-diastolic volume (mL), median     | -5.21E-03                                        | -2.25E-03                                     |
| LV end-systolic volume (mL), first       | -7.33E-03                                        | -5.66E-03                                     |
| LVOT pressure gradient (mmHg), first     | 7.41E-03                                         | 0.0103                                        |
| LVOT pressure gradient (mmHg), median    | 1.86E-03                                         | 2.60E-03                                      |
| Aortic pressure gradient (mmHg), median  | -0.0351                                          | -0.0381                                       |
| LA diameter (cm), max                    | 0.187                                            | 0.225                                         |
| E/A, max                                 | 0.292                                            | 0.305                                         |
| E/e' average, max                        | 7.24E-03                                         | 0.0129                                        |
| E/e' lateral, median                     | 9.83E-03                                         | 0.0121                                        |
| E/e' septal, max                         | 0.0309                                           | 0.0297                                        |

|                                |        |        |
|--------------------------------|--------|--------|
| MV deceleration time (ms), min | -0.386 | -0.814 |
| Identified by text mining      | -      | 1.60   |

Coefficients of the logistic Lasso regression fitted to the train data of the subjects with echocardiographic left ventricular hypertrophy (n = 9,825). Coefficients correspond to each unit increase of variable. The Lasso logistic regression fitted on the subjects with echocardiographic LVH (best lambda = 0.001) using the top 50 XGBoost variables correctly identified 6 out of 39 subjects with and 2,412 out of 2,417 subjects without ULVH (sensitivity 0.154, specificity 0.998, PPV 0.545, NPV 0.987). Inclusion of text mining as a variable (best lambda = 0.001) slightly decreased performance, correctly identifying the same numbers of subjects with ULVH but misclassifying one additional subject without ULVH (2411 out of 2417; specificity 0.998, PPV 0.500).
